# Supplementary material for: Bone morphogenetic protein receptor 1A signaling is dispensable for hematopoietic development but essential for vessel and atrioventricular endocardial cushion formation
Source: Oxford University Press journal article supplement (doi:10.1242/dev.02499), 2006-08-04
Supplement: dev02499supptable.pdf [file dev02499supptable.pdf]

**Table S1. Genotypic analysis of pups from  $Flk1^{+/Cre}Smad4^{+/floxed} \times Smad4^{floxed/floxed}$** 

|       | $Flk1^{+/Cre}Smad4^{floxed/floxed}$ | $Flk1^{+/Cre}Smad4^{+/floxed}$ | $Smad4^{floxed/floxed}$ | $Smad4^{+/floxed}$ |
|-------|-------------------------------------|--------------------------------|-------------------------|--------------------|
| E8.5  | 4/15                                | 5/15                           | 4/15                    | 2/15               |
| E9.5  | 13(3*)/40                           | 11/40                          | 8/40                    | 8/40               |
| E10.5 | 1*/14                               | 4/14                           | 4/14                    | 5/14               |
| E11.5 | 3*/8                                | 1/8                            | 1/8                     | 3/8                |

E, embryonic day; P, postnatal day; \*, number of moribund embryos.
